1 **Temporal and Thematic Analysis of Promotional Waterpipe-Related Posts on**  
2 **Twitter/X in the US**

3 Puhua Ye, BS<sup>1</sup>, Mengwei Wu, BS<sup>1</sup>, Yiwei Han, BS<sup>1</sup>, Yuka Shimazaki, BS<sup>1</sup>, Jennifer  
4 Cornacchione Ross, PhD<sup>2</sup>, Erin L. Sutfin, PhD<sup>3</sup>, Dongmei Li, PhD<sup>4</sup> and Zidian Xie, PhD<sup>4</sup> \*

5 <sup>1</sup> Goergen Institute for Data Science, University of Rochester, Rochester, NY, USA

6 <sup>2</sup> Department of Health Law, Policy and Management, Boston University School of Public  
7 Health, Boston, MA, USA

8 <sup>3</sup> Department of Social Sciences and Health Policy, Wake Forest University School of Medicine,  
9 Winston-Salem, NC, USA

10 <sup>4</sup> Department of Clinical and Translational Research, University of Rochester Medical Center,  
11 Rochester, NY, USA

12

13 Correspondence to:

14 Dr. Zidian Xie

15 Department of Clinical and Translational Research, University of Rochester Medical Center,  
16 Rochester, NY 14642-0708, USA

17 E-mail: [zidian\\_xie@urmc.rochester.edu](mailto:zidian_xie@urmc.rochester.edu)

18 Telephone: 585-275-4398

19

20

21 Abstract Word Count: 249

22 Text Word Count: 3,343

## 23 **Abstract**

### 24 **Introduction**

25 Waterpipe tobacco smoking (WTS), also known as hookah, shisha, or narghile, is particularly  
26 popular among young people in the United States (US). WTS poses serious health risks similar  
27 to those of cigarette smoking.

### 28 **Methods**

29 Using the Twitter/X streaming API (Application Programming Interface), we collected  
30 4,853,562 tweets between March 9, 2021, and March 14, 2023, using waterpipe-related  
31 keywords, such as “hookah” and “waterpipe”. After geographical filtering to identify tweets  
32 from the US and keyword filtering for the promotional content, we identified 23,803 promotional  
33 waterpipe-related tweets. We examined trends in the posting time of these promotional  
34 waterpipe-related tweets and identified prevalent topics from these tweets using the BERTopic  
35 (Bidirectional Encoder Representations from Transformers) modeling.

### 36 **Results**

37 The number of promotional waterpipe-related tweets showed an overall decreasing trend during  
38 the study period. The posting of promotional waterpipe-related tweets was more active later in  
39 the day. Major topics in the promotional tweets included “Promotion from hookah lounges and  
40 online hookah business” (63.97%, 15,227/23,803), “promoting hookah parties and events”  
41 (32.26%, 7,679/23,803), and “promoting engineered and durable hookah products” (3.77%,  
42 897/23,803). Twitter/X accounts posting waterpipe-related promotional content have substantial  
43 variations in the number of relevant tweets (mean = 2.28, SD = 12.22) and followers (mean =  
44 5,937, SD = 76,770).

### 45 **Conclusions**

46 This study demonstrates a significant social media activity in promoting waterpipe tobacco  
47 smoking. Our findings underscore the urgent need to regulate the promotional content of WTS  
48 on social media and promote public health education messages on social media to counteract the  
49 promotion of WTS.

50

## 51 **Introduction**

52 Waterpipe tobacco smoking (WTS), also known as hookah, shisha, or narghile is a traditional  
53 smoking device that originated in India over a millennium ago and has recently gained popularity  
54 in the United States (US) (1). In 2021, approximately 0.9% of US adults, which equates to an  
55 estimated 2.2 million people, reported currently using hookah (2). Among those who use  
56 waterpipe, young people, especially college students, make up the majority of users (3). Around  
57 8-17% of college students currently use waterpipe tobacco, and about 35-64% have tried it at  
58 least once. A recent systematic review showed that waterpipe use among young people in the US  
59 is increasing by up to 1% annually (4). Among university students in the US, waterpipe tobacco  
60 smoking is the second most prevalent form of tobacco use, following cigarettes (5). Another  
61 study suggests that college students are at a higher risk of smoking waterpipe and there is also a  
62 notable knowledge gap and misperception regarding the potential harm of hookah, particularly  
63 among young, college-educated, and never-smokers (6).

64

65 Most waterpipe users believe that smoking waterpipe tobacco is less harmful than other forms of  
66 tobacco use (6). This misconception is particularly prevalent among college students (6-8). In a  
67 study of college students, less than 37% of them correctly answered any questions about the  
68 toxins produced by a 45-minute waterpipe session compared to a five-minute cigarette session

69 (8). Some studies report that college students mistakenly believe that waterpipe smoking is less  
70 harmful than cigarette smoking due to the perceived filtering effect of water, the social and  
71 intermittent use patterns, and the smooth, aromatic smoke (9, 10). However, in reality, one  
72 session of waterpipe tobacco smoking consistently exposes users to larger volumes of smoke and  
73 higher levels of toxic substances, such as nicotine, tar, and carbon monoxide (CO) compared to  
74 smoking a single cigarette (11). WTS is also likely associated with lung cancers, as well as  
75 respiratory diseases, low birth weight, metabolic syndrome, cardiovascular disease, and mental  
76 health issues (1, 12, 13). Additionally, the manner in which waterpipe tobacco is used, along  
77 with the common practice of sharing the mouthpiece, leads to additional health risks compared to  
78 other tobacco products. Sharing the mouthpiece during WTS can transmit pathogens such as  
79 viruses, bacteria, and fungi, increasing the risk of diseases like hepatitis C, tuberculosis, peptic  
80 ulcers, pneumonia, and periodontal diseases (1, 14-17).

81  
82 An important factor contributing to the misconceptions about WTS and its widespread popularity  
83 is the influence of media (18). In the early 1990s, satellite TV broadcasts from cafés and  
84 restaurants during Ramadan helped to advertise and popularize the waterpipe, making it more  
85 familiar to people in the Middle East (18). Today, social media has become a major avenue for  
86 promoting waterpipe (19, 20). There is substantial evidence that exposure to tobacco marketing  
87 and promotions, including on social media, is associated with tobacco product initiation and use,  
88 reduced harm perceptions, and increased positive tobacco product attitudes (21, 22). Promotions  
89 are used to increase interest in and sales of products. However, research has also demonstrated  
90 social media to be a promising channel for disseminating risk messages about WTS by  
91 counteracting the impact of promotional content (23). Therefore, understanding how waterpipe is

92 promoted on social media is crucial to inform policies about marketing restrictions and  
93 identifying targets for risk messaging.

94

95 Twitter/X is a widely-used social media platform with over 500 million monthly active users  
96 worldwide. In the US, it has more than 50.5 million monthly active users in 2023. Around 60%  
97 of Twitter/X users are youth and young adults aged 13 – 34 (24). Twitter/X data have been  
98 utilized to examine public perceptions and discussions regarding tobacco products, including  
99 waterpipe (25-28) and related regulatory policies (29-31). This study aims to provide important  
100 insights into how waterpipe is promoted on social media. By analyzing promotional waterpipe-  
101 related tweets, this research seeks to identify the main themes and trends in waterpipe promotion  
102 on Twitter/X. The findings could inform future regulatory measures, such as potential  
103 promotional marketing restrictions, and public health policies to reduce waterpipe use and  
104 associated health risks.

105

## 106 **Materials and Methods**

### 107 **Ethics Statement**

108 This study was reviewed and approved by the Research Subjects Review Board of the  
109 Office for Human Subject Protection at the University of Rochester (STUDY00006570). Patient  
110 consent for publication is not required as the data were analyzed anonymously.

111

### 112 **Data Collection and Preprocessing**

113 Twitter/X data related to waterpipe were collected in real-time using the Twitter/X streaming  
114 API (Application Programming Interface) between March 9, 2021, and March 14, 2023, using

115 waterpipe-related keywords such as “hookah” and “waterpipe” (26, 32). The initial dataset  
116 contains 4,853,562 tweets. To focus on tweets from the US we applied a geographical filter  
117 based on the user location metadata. Specifically, we used the names and abbreviations of the 50  
118 US states and major US cities to identify tweets originating from the US (33, 34). Following  
119 geographical filtering, we further filtered the dataset to identify tweets related to waterpipe  
120 smoking. A comprehensive list of keywords was used, including terms such as "waterpipe,"  
121 "hookah," "shisha," "narghile," "argileh," "goza," and "hubble-bubble." These keywords were  
122 identified within the tweet text. Furthermore, several data-cleaning steps were performed. For  
123 example, duplicate tweets and retweets have been identified and removed by checking for tweets  
124 starting with "RT @" and comparing the text of tweets to ensure uniqueness.

125  
126 Tweets were classified into promotional and non-promotional categories using a rule-based  
127 approach. We defined 'promotional' tweets as those that explicitly or implicitly promote  
128 waterpipe use, including tweets from waterpipe brands, online retailers, hookah bars/lounges,  
129 and consumers engaging in promotional activity. This classification was based on the presence of  
130 specific keywords indicative of promotional content in the tweet text, user screen name, and  
131 username. Keywords included terms such as "dealer," "deal," "promotion," "sale," "discount,"  
132 "store," "promo," and others (27). The final dataset consisted of 323,347 waterpipe-related  
133 tweets from the US, with 299,544 non-promotional tweets and 23,803 promotional tweets.

134

### 135 **Data Analysis**

136 We conducted a temporal analysis of the tweets to understand the distribution of promotional  
137 waterpipe-related tweets over time. The timestamp (adjusted for the local time zone) of each

138 tweet is in the ‘timestamp\_ms’ field. We grouped the tweets based on this timestamp to analyze  
139 their frequency by hour, day, and month. This clustering allowed us to identify periods of high  
140 and low activity. We visualized the results using Matplotlib and Tableau to create time series  
141 plots and heatmaps.

142  
143 For user analysis, we collected the unique user ID, follower count, and the number of tweets  
144 posted by each Twitter/X user. The follower count for each user was determined by extracting  
145 the highest follower count reported in the relevant tweets by this user. The total number of tweets  
146 posted by each user was calculated by aggregating the tweets during our study period based on  
147 the user ID.

148

### 149 **Topic Modeling Analysis**

150 We utilized BERTopic (Bidirectional Encoder Representations from Transformers) to identify  
151 popular topics in promotional waterpipe-related tweets. BERTopic is a topic modeling technique  
152 that generates the embedding (numerical representations of the text data in a high-dimensional  
153 space that capture the semantic meaning of the words and phrases) with a pre-trained language  
154 model, clusters these embedding, and generates topic representations with the class-based TF-  
155 IDF procedure (35). To ensure consistency in the preprocessing steps, we converted all  
156 characters to lowercase and lemmatized all words using WordNetLemmatizer. Additionally, we  
157 removed stop words (e.g. a, an, and, but, in), punctuation, web links, and emojis using the  
158 Natural Language Toolkit (NLTK) and Regular Expression (RE). We initially applied K-Means  
159 clustering to group the tweets and set the ‘hdbscan\_model’ parameter to the model trained with  
160 K-Means. We experimented with the number of clusters from three to ten and determined the

161 optimal number of clusters using coherence scores and visualization maps to observe the  
162 intertopic distance.

163

## 164 **Results**

### 165 **Temporal Analysis of Promotional Waterpipe-Related Tweets**

166 We collected a total of 4,853,562 tweets from March 9, 2021, to March 14, 2023 using  
167 waterpipe-related keywords, of which 323,347 waterpipe-related tweets were identified as  
168 originating from the United States. There were 299,544 non-promotional waterpipe-related  
169 tweets (92.64%) and 23,803 promotional waterpipe-related tweets (7.36%). In this study, we  
170 focused on promotional waterpipe-related tweets. Fig 1 illustrates the monthly frequency of  
171 promotional waterpipe-related tweets, revealing distinct trends over the study period. From April  
172 2021 to July 2021, there was a general upward trend, followed by an overall gradual decrease.  
173 However, we observed two noticeable peaks, one is in November 2021 and the other one is in  
174 April 2022. From S1 Figure, we can see that the overall trend in the number of users is similar to  
175 the trend in the number of tweets except that in November 2021 the number of users did not  
176 show a noticeable peak.

177

### 178 **Figure 1. Temporal Trend in Promotional Waterpipe-Related Tweets.**

179

180 Fig 2 presents the distribution of promotional waterpipe-related tweets by hour in the day and  
181 day of the week, with a color gradient representing tweet volume—darker shades indicate higher  
182 activity while lighter shades represent lower activity. The overall activity patterns show some  
183 variation in tweet frequency throughout the day and the week. The tweet volume is generally



184 lower during the early morning and increases as the day progresses, peaking in the late afternoon  
185 and evening. The highest activity is observed on Tuesdays at 6:00 PM, with 327 tweets. Across  
186 most weekdays, particularly from Tuesday to Thursday, the high posting activity consistently  
187 appears from 4:00 PM to 8:00 PM. Those weekdays, especially Tuesday to Thursday, experience  
188 higher posting activity than the weekend.

189

190 **Figure 2. Number of Promotional Waterpipe-Related Tweets Posted at Different Times in a**  
191 **Day and Days of the Week.**

192

193 **Analysis of Twitter/X Accounts for Promoting Waterpipe**

194 From 23,803 promotional waterpipe-related tweets, we have identified 10,524 unique Twitter/X  
195 accounts. The median number of promotional waterpipe-related tweets per Twitter/X account is  
196 1, with a range from 1 to 690. In our analysis of 10,524 accounts with available follower counts,  
197 the average number of followers per account was 5,937 (the median = 768), with a range from 0  
198 to 4,008,382. The follower counts varied significantly ( $SD=76,770$ ), with 3.2% of accounts  
199 having fewer than ten followers and 5.7% having more than 10,000 followers.

200

201 S1 Table provides the top ten Twitter/X users with the most promotional waterpipe-related  
202 tweets during our study period. Among these top ten Twitter/X users, five accounts belong to  
203 hookah business owners who use Twitter/X to advertise their online waterpipe shops, four  
204 accounts are associated with hookah lounges promoting events at their establishments, and one  
205 account falls into the "other" category, focusing on teaching people how to smoke hookah. The  
206 number of tweets posted by these users varied significantly, ranging from 204 to 690 tweets. In

207 addition, we observe a wide range of follower counts among the users, from as few as three  
 208 followers to as many as 5,884 followers.

209

210 **Major Topics Discussed in Promotional Waterpipe Related Tweets**

211 To understand the main themes in the promotional waterpipe-related tweets, we performed a  
 212 topic modeling analysis using BERTopic. As shown in Table 1, three major topics were  
 213 identified, including “Promotion from hookah lounges and online hookah business” (63.97%,  
 214 15,227/23,803), “Promoting hookah parties and events that offer hookah” (32.26%,  
 215 7,679/23,803), and “Promoting engineered and durable hookah products” (3.77%, 897/23,803).

216 **Table 1. Major Topics Discussed in Promotional Waterpipe-Related Tweets.**

| Major topic (percentage, n/N)                                                              | Description                                                                                                                                                                                                                                                  | Keywords                                                              | Example tweets                                                                                                                                                                                                                                                                                                                                    |
|--------------------------------------------------------------------------------------------|--------------------------------------------------------------------------------------------------------------------------------------------------------------------------------------------------------------------------------------------------------------|-----------------------------------------------------------------------|---------------------------------------------------------------------------------------------------------------------------------------------------------------------------------------------------------------------------------------------------------------------------------------------------------------------------------------------------|
| Topic 1: Promotion from hookah lounges and online hookah business. (63.97%, 15,227/23,803) | Tweets promote various hookah lounges and their offerings, emphasizing the events such as special nights, often featuring different shisha flavors and special deals, and various hookah business and their products, emphasizing the quality and discounts. | hookah, smoke, lounge, come, store, night, flavor, free, like, shisha | 1. “BOOM: New 21+ Friday Night Wave For The People \$4 Sex On The Beach \$7 Henny & Patron \$20 Hookah Catered Food LITERALLY NO COVER CHARGE MEANING FREE ENTRY ALL NIGHT NO GAMES NO GIMMICKS #WeBackOutsideFridays Culture Lounge”<br><br>2. “New Product - Delta 8 Shisha \$39.99 Available Now in 2 Flavors - Mighty Mint and Pink Lemonade” |

|                                                                                                       |                                                                                                                                                                                                                      |                                                                                                                   |                                                                                                                                                                                                                                                                                                                                                    |
|-------------------------------------------------------------------------------------------------------|----------------------------------------------------------------------------------------------------------------------------------------------------------------------------------------------------------------------|-------------------------------------------------------------------------------------------------------------------|----------------------------------------------------------------------------------------------------------------------------------------------------------------------------------------------------------------------------------------------------------------------------------------------------------------------------------------------------|
| <p>Topic 2:<br/><b>Promoting parties</b><br/>and events that offer hookah. (32.26%, 7,679/23,803)</p> | <p>Tweets advertise parties and gatherings, often offering free entry, complimentary food, and shisha. These events are typically scheduled for weekends, creating a lively and social atmosphere for attendees.</p> | <p>free, hookah, night, shisha, party, come, tonight, drink, happy, Saturday</p>                                  | <p>1. “PLS RT☞☞ Brunch + Mimosas + Drink Specials + Hookah + #SunDAYFUNday #BrunchaholicsAnonymous Reservations/Info:”</p> <p>2. “FTS ITS HOMECOMING DAY PARTY March 13, 2021 2pm -7pm Greeks \$5 all day Get the pre-sales now Hookah and Live Dj ——— Txt Number on flyer for the addy #ASUTwitter #FVSU”</p>                                     |
| <p>Topic 3:<br/><b>Promoting</b><br/>engineered and durable hookah products. (3.77%, 897/23,803)</p>  | <p>The tweets emphasize the advanced design and quality of the waterpipe tobacco, making it a standout product in the market.</p>                                                                                    | <p>revolutionary, engineered, durable, smooth, waterpipe, available, easily, whatsapp, calhounmemorial, suite</p> | <p>1. “Engineered to be the smoothest, most durable, and revolutionary waterpipe available!”</p> <p>2. “Our hookah’s are perfect for those at home date nights, Valentine’s Day, girls nights &amp; baecations! All hookah’s come with shisha, coals &amp; hookah tips! We also sell custom shisha mixes and jolly rancher candy hookah tips!”</p> |

217  
218 Figure 3 shows the distribution of these main topics over the study period. We observed that the  
219 topic of promoting hookah lounges and shisha flavors had the highest number of tweets  
220 throughout the study period, peaking several times. The topic of promoting hookah parties and  
221 events showed periodic peaks, particularly during months with major holidays. The topic of

222 promoting engineered and durable hookah products had the lowest volume but maintained a  
223 steady presence over time. From S2 Figure, we can observe that the proportion of Topic 1  
224 consistently remains between 60% and 70%, maintaining a dominant presence during the study  
225 period. Noticeable, Topic 2 shows several significant increases, such as in November 2021, April  
226 2022, and October 2022. These peaks also coincide with the overall tweet trend peaks during  
227 those periods.

228

229 **Figure 3. Major Topics in Promotional Waterpipe-Related Tweets over Time.** Topic 1:  
230 Promotion from hookah lounges and online hookah business; Topic 2: Promoting parties and  
231 events that offer hookah; Topic 3: Promoting engineered and durable hookah products.

232

## 233 **Discussion**

234 Using Twitter/X data from March 9, 2021, to March 14, 2023, this study examined waterpipe  
235 tobacco-related promotions on social media. The temporal trend analysis indicates an initial  
236 increase in the number of promotional tweets until July 2021, followed by a general decline  
237 except for two significant peaks in November 2021 and April 2022. The topic modeling analysis  
238 identified three primary themes in the promotional tweets, including hookah lounges promoting  
239 their establishments through discounts and events, party events or other venues emphasizing the  
240 availability of hookah as part of their offerings, and the promotion of specific hookah products.  
241 The frequency of promotional tweets did not appear to be related to the number of followers,  
242 suggesting that businesses of various sizes, irrespective of their social media following, utilize  
243 Twitter/X to promote waterpipe smoking.

244

245 During the study period, two significant peaks in the number of promotional waterpipe-related  
246 tweets appeared in November 2021 and April 2022. After manually reviewing the tweet content  
247 from these two months, we found that The November 2021 peak corresponded with heightened  
248 promotional activity, while the April 2022 peak coincided with a rising trend of enjoying the  
249 waterpipe tobacco during brunch, exemplified by tweets such as: "*#TheBrunchMarket returns to*  
250 *#BeatsBrunchandBubbly TODAY from 12pm to 4pm at RainDogs in #FivePointsJax!• Beats by*  
251 *EnerJi• Brunch by: High Elevated Eatz• Bubbly: \$12 AYCD #BottomlessMimosas• Hookah*  
252 *Service• Featuring Local Vendors•: Come thru & catch the vibes!!*" and "*Brunch n Boozy*  
253 *Sundays 12pm - 6pm, Section 6 People with hookah & bottomless mimosas \$175, High Top*  
254 *4 People with hookah & bottomless mimosas \$125, Section 6 People 1 Bottle \$250*". The  
255 two peaks are consistent with the similar peaks in Topic 1 (promotion of hookah lounge) and  
256 Topic 2 (promotion of parties with hookah). There might be two main factors contributing to the  
257 peak in November 2021. First, we observed that some hookah lounges began engaging in direct  
258 marketing on social media by responding to users' tweets to promote their services. In  
259 November, the number of promotional tweets that began with "@", which means direct replies to  
260 specific users, increased from 112 in the previous month to 465 tweets. This finding aligns with  
261 one previous study showing that direct marketing is a crucial channel for tobacco companies  
262 (36). For instance, 16 million (7.1%) US adults reported receiving e-cigarette promotions via  
263 mail or email between 2013 and 2014 (37). In addition, the presence of Black Friday and  
264 Thanksgiving holidays in November led to an increase in tweets from hookah lounges offering  
265 discounts and event organizers promoting free hookah at parties. Another study on e-cigarette  
266 marketing on Twitter/X reported that about a third of all commercial e-cigarette tweets during  
267 two months (May–June 2012) contained mentions of prices or discounts (38). We suspect that

268 another surge in promotional tweets in April 2022 might partially result from the celebration of  
269 the Spring season. Specifically, there was a notable rise in tweets promoting enjoying waterpipe  
270 tobacco during brunch.

271

272 We noticed a surge of promotional waterpipe tobacco-related tweets in the late afternoon and  
273 evening, especially Thursday and Tuesday. Several factors may explain the observed patterns.

274 The increased activity during late afternoons and evenings on weekdays could be attributed to  
275 users being more active on social media after working or school hours, making these times  
276 optimal for promoting WTS. The high volume of tweets on Thursdays might be due to hookah  
277 bars or lounges posting announcements for upcoming weekend events to attract customers.

278 Similarly, the peak on Tuesdays could be related to promotional strategies targeting early week  
279 engagement to boost midweek and weekend attendance at venues. To counteract the impact of  
280 waterpipe tobacco promotional activity on social media, the waterpipe tobacco prevention  
281 messages should be encouraged during these peak days and times of promotional tweets,  
282 ensuring they reach the target audience when promotional activity is at its highest.

283

284 The topic analysis revealed that waterpipe-related promotions predominantly occurred through  
285 hookah lounges and other social event organizers, which is consistent with Ziyad's study  
286 showing that promotional posts often highlighted events with 37.4% promoting activities held at  
287 hookah lounges or bars and 22.2% featuring general events where hookah was also available  
288 (39). In contrast, traditional tobacco products often focus on the product's attributes, such as  
289 quality, flavor, and health claims (e.g., e-cigarettes marketed as safer alternatives to smoking)  
290 (40). The difference in the promotion strategy between waterpipe and other tobacco products can

291 be attributed to the unique usage method of waterpipes and its inherent social attributes. Unlike  
292 portable tobacco products, waterpipes consist of a head (bowl), a vertical stem (body), and a  
293 flexible hose with a mouthpiece. The waterpipe tobacco is heated by burning charcoal, producing  
294 smoke that the user inhales through the hose (41), a setup that is less convenient for on-the-go  
295 use compared to cigarettes or e-cigarettes. In addition, WTS has a strong social component (7,  
296 42-44). A previous study involving café patrons and internet forum users found that one of the  
297 most common perceived positive attributes of waterpipe tobacco smoking was the opportunity to  
298 socialize with friends, with 79.6% of participants highlighting this aspect (45). This social nature  
299 makes waterpipe lounges and events ideal venues for promoting WTS, differentiating it from  
300 other tobacco products often marketed based on individual usage and convenience. The direct  
301 and active promotion of WTS on social media by hookah lounges and other businesses can  
302 potential promote the waterpipe tobacco use, which should be closely monitored and regulated  
303 by public health authorities to protect public health.

304  
305 Among those Twitter/X users posting promotional waterpipe-related tweets, including the top 10  
306 user accounts, there was a significant variation in the number of waterpipe-related tweets and  
307 followers. This finding aligns with a previous study on e-cigarettes on Instagram, which revealed  
308 that the number of followers varied greatly for accounts promoting e-cigarettes (38). These  
309 results indicate that both large and small businesses are actively utilizing social media platforms  
310 to promote tobacco products, including WTS. This trend highlights the diverse range of social  
311 media users engaged in marketing activities, regardless of their follower base size. Moreover, in  
312 the top 10 user accounts, there is an equal representation of hookah lounges and hookah online  
313 retailers, illustrating that waterpipe tobacco promotion involves both online sales, similar to other

314 tobacco products, and a substantial presence from hookah lounges. The widespread use of social  
315 media for promoting waterpipe tobacco smoking underscores the need for government regulation  
316 to effectively monitor and manage these activities.

317  
318 Our study has several limitations. First, using the keywords to filter and classify promotional vs.  
319 non-promotional tweets may have inherent biases and inaccuracies. Future research could use  
320 machine learning or deep learning methods to improve the accuracy of tweet classification.  
321 Second, our data collection was limited to Twitter/X, so our findings may not reflect promotional  
322 activities on other social media platforms due to different user behaviors and demographics.  
323 Future work is warranted to investigate the waterpipe promotional activity on other social media  
324 platforms (such as Instagram and TikTok) that are more likely to target at the youth and young  
325 adults. Third, although we filtered for tweets from the United States, some tweets might have  
326 been inaccurately geo-tagged or lacked geolocation information, leading to potential  
327 misrepresentation of the geographic distribution of promotional activities. Fourth, when  
328 analyzing the user types of Twitter/X users promoting waterpipe, we only categorized the top 10  
329 users with the highest follower counts, which represents a biased sample and may not reflect the  
330 full spectrum of users promoting waterpipe tobaccos. Future studies should aim to analyze all  
331 users promoting waterpipe tobaccos to better understand these Twitter/X users. Last, Twitter/X  
332 does not provide demographic information (such as age, gender, and race/ethnicity) on  
333 Twitter/X, making it impossible to determine the demographics of followers of waterpipe  
334 tobacco-promoting accounts. Future studies should consider addressing these limitations by  
335 employing more advanced classification techniques and expanding the scope to include multiple



336 social media platforms. In addition, with the rapid change in the waterpipe tobacco marketing,  
337 continuous monitoring of waterpipe tobacco promotion on social media become necessary.

338

## 339 **Conclusion**

340 This study examined the promotion activity of waterpipe tobacco smoking (WTS) on Twitter/X.  
341 The analysis indicated an initial increase in promotional tweets until July 2021, followed by a  
342 general decline. The tweets mainly focus on hookah lounges promoting their establishments  
343 through discounts and events, party events, or other venues emphasizing the availability of  
344 hookah, and the promotion of specific hookah products. User analysis revealed that businesses of  
345 various sizes, irrespective of the size of their social media followers, utilize Twitter/X to promote  
346 waterpipe tobacco smoking. These findings highlight the strategic use of social media platforms  
347 like Twitter/X to promote waterpipe tobacco smoking, particularly among younger audiences,  
348 and emphasize the necessity for targeted public health interventions to address this issue.  
349 Continuous monitoring of promotional activities and understanding the factors driving these  
350 trends can inform policy decision-making and public health initiatives, such as regulating the  
351 content of online advertisements of waterpipe tobacco smoking. By addressing these promotional  
352 strategies, policymakers can better regulate waterpipe tobacco marketing and reduce its  
353 associated health risks.

354

## 355 **Acknowledgements**

356 None.

357

## 358 **Funding**

359 This work was supported by the National Cancer Institute (R01CA285482), the National Cancer  
360 Institute of the National Institutes of Health (NIH) and the Food and Drug Administration (FDA)  
361 Center for Tobacco Products under Award Number (U54CA228110).

362

### 363 **Contributions**

364 ZX, DL: conceived and designed the study. PY, MW, YH, YS, ZX, DL: analyzed the data. PY,  
365 JCR, ELS, ZX, and DL: assisted with interpretation of analyses and wrote and edited the  
366 manuscript.

367

### 368 **Disclaimer**

369 The content is solely the responsibility of the authors and does not necessarily represent the  
370 official views of the NIH or the FDA.

371

### 372 **Declaration of Interests**

373 None declared.

374

### 375 **Data Availability**

376 The data present in this study can be requested from the corresponding author.

### 377 **Ethics approval**

378 This study has been reviewed and approved by the Office for Human Subject Protection  
379 Research Subjects Review Board (RSRB) at the University of Rochester (Study ID:  
380 STUDY00006570).

381

382

## 383 REFERENCES

- 384
- 385 1. Qasim H, Alarabi AB, Alzoubi KH, Karim ZA, Alshbool FZ, Khasawneh FT. The effects of  
386 hookah/waterpipe smoking on general health and the cardiovascular system. *Environ Health*  
387 *Prev Med.* 2019;24(1):58.
  - 388 2. Cornelius ME, Loretan CG, Jamal A, Davis Lynn BC, Mayer M, Alcantara IC, et al.  
389 Tobacco Product Use Among Adults - United States, 2021. *MMWR Morb Mortal Wkly Rep.*  
390 2023;72(18):475-83.
  - 391 3. Kates FR, Salloum RG, Thrasher JF, Islam F, Fleischer NL, Maziak W. Geographic  
392 Proximity of Waterpipe Smoking Establishments to Colleges in the U.S. *Am J Prev Med.*  
393 2016;50(1):e9-e14.
  - 394 4. Sidani JE, Shensa A, Yabes J, Fertman C, Primack BA. Waterpipe tobacco use in  
395 college and non-college young adults in the USA. *Fam Pract.* 2019;36(2):103-9.
  - 396 5. Primack BA, Shensa A, Kim KH, Carroll MV, Hoban MT, Leino EV, et al. Waterpipe  
397 smoking among U.S. university students. *Nicotine Tob Res.* 2013;15(1):29-35.
  - 398 6. Majeed BA, Sterling KL, Weaver SR, Pechacek TF, Eriksen MP. Prevalence and harm  
399 perceptions of hookah smoking among U.S. adults, 2014-2015. *Addict Behav.* 2017;69:78-86.
  - 400 7. Akl EA, Jawad M, Lam WY, Co CN, Obeid R, Irani J. Motives, beliefs and attitudes  
401 towards waterpipe tobacco smoking: a systematic review. *Harm Reduct J.* 2013;10:12.
  - 402 8. Lipkus IM, Eissenberg T, Schwartz-Bloom RD, Prokhorov AV, Levy J. Relationships  
403 among factual and perceived knowledge of harms of waterpipe tobacco, perceived risk, and  
404 desire to quit among college users. *J Health Psychol.* 2014;19(12):1525-35.
  - 405 9. Heinz AJ, Giedgowd GE, Crane NA, Veilleux JC, Conrad M, Braun AR, et al. A  
406 comprehensive examination of hookah smoking in college students: use patterns and contexts,  
407 social norms and attitudes, harm perception, psychological correlates and co-occurring  
408 substance use. *Addict Behav.* 2013;38(11):2751-60.
  - 409 10. Sutfin EL, McCoy TP, Reboussin BA, Wagoner KG, Spangler J, Wolfson M. Prevalence  
410 and correlates of waterpipe tobacco smoking by college students in North Carolina. *Drug*  
411 *Alcohol Depend.* 2011;115(1-2):131-6.
  - 412 11. Primack BA, Carroll MV, Weiss PM, Shihadeh AL, Shensa A, Farley ST, et al.  
413 Systematic Review and Meta-Analysis of Inhaled Toxicants from Waterpipe and Cigarette  
414 Smoking. *Public Health Rep.* 2016;131(1):76-85.
  - 415 12. Mahfooz K, Vasavada AM, Joshi A, Pichuthirumalai S, Andani R, Rajotia A, et al.  
416 Waterpipe Use and Its Cardiovascular Effects: A Systematic Review and Meta-Analysis of  
417 Case-Control, Cross-Sectional, and Non-Randomized Studies. *Cureus.* 2023;15(2):e34802.
  - 418 13. Waziry R, Jawad M, Ballout RA, Al Akel M, Akl EA. The effects of waterpipe tobacco  
419 smoking on health outcomes: an updated systematic review and meta-analysis. *Int J Epidemiol.*  
420 2017;46(1):32-43.
  - 421 14. Blachman-Braun R, Del Mazo-Rodriguez RL, Lopez-Samano G, Buendia-Roldan I.  
422 Hookah, is it really harmless? *Respir Med.* 2014;108(5):661-7.
  - 423 15. Habib M, Mohamed MK, Abdel-Aziz F, Magder LS, Abdel-Hamid M, Gamil F, et al.  
424 Hepatitis C virus infection in a community in the Nile Delta: risk factors for seropositivity.  
425 *Hepatology.* 2001;33(1):248-53.
  - 426 16. Szyper-Kravitz M, Lang R, Manor Y, Lahav M. Early invasive pulmonary aspergillosis in  
427 a leukemia patient linked to aspergillus contaminated marijuana smoking. *Leuk Lymphoma.*  
428 2001;42(6):1433-7.
  - 429 17. Urkin J, Ochaion R, Peleg A. Hubble bubble equals trouble: the hazards of water pipe  
430 smoking. *ScientificWorldJournal.* 2006;6:1990-7.
  - 431 18. Nakkash RT, Khalil J, Afifi RA. The rise in narghile (shisha, hookah) waterpipe tobacco  
432 smoking: a qualitative study of perceptions of smokers and non smokers. *BMC Public Health.*  
433 2011;11:315.

- 434 19. Donaldson EA, Hoffman AC, Zandberg I, Blake KD. Media exposure and tobacco  
435 product addiction beliefs: Findings from the 2015 Health Information National Trends Survey  
436 (HINTS-FDA 2015). *Addict Behav.* 2017;72:106-13.
- 437 20. Link AR, Cawkwell PB, Shelley DR, Sherman SE. An Exploration of Online Behaviors  
438 and Social Media Use Among Hookah and Electronic-Cigarette Users. *Addict Behav Rep.*  
439 2015;2:37-40.
- 440 21. Clendennen SL, Mantey DS, Wilkinson AV, Perry CL, Harrell MB, Loukas A. Digital  
441 marketing of smokeless tobacco: A longitudinal analysis of exposure and initiation among young  
442 adults. *Addict Behav.* 2021;117:106850.
- 443 22. Donaldson SI, Dormanesh A, Perez C, Majmundar A, Allem JP. Association Between  
444 Exposure to Tobacco Content on Social Media and Tobacco Use: A Systematic Review and  
445 Meta-analysis. *JAMA Pediatr.* 2022;176(9):878-85.
- 446 23. Johnson AC, Mays D. Testing the Effects of Hookah Tobacco Social Media Risk  
447 Communication Messages Among Young Adults. *Health Educ Behav.* 2021;48(5):627-36.
- 448 24. Center PR. Social Media Fact Sheet 2024 [Available from:  
449 <https://www.pewresearch.org/internet/fact-sheet/social-media/>.
- 450 25. Chen J, Xue S, Xie Z, Li D. Perceptions and Discussions of Snus on Twitter:  
451 Observational Study. *JMIR Med Inform.* 2022;10(8):e38174.
- 452 26. Feliciano JR, Li D, Xie Z. Public Perceptions of Flavored Waterpipe Smoking on Twitter.  
453 *Int J Environ Res Public Health.* 2023;20(7).
- 454 27. Lu X, Chen L, Yuan J, Luo J, Luo J, Xie Z, et al. User Perceptions of Different Electronic  
455 Cigarette Flavors on Social Media: Observational Study. *J Med Internet Res.*  
456 2020;22(6):e17280.
- 457 28. Sun L, Tao C, Xie Z, Li D. Promotion of Disposable Electronic Cigarette Flavors and  
458 Topics on Twitter. *Int J Environ Res Public Health.* 2020;17(24).
- 459 29. Lu X, Sun L, Xie Z, Li D. Perception of the Food and Drug Administration electronic  
460 cigarette flavor enforcement policy on Twitter: observational study. *JMIR Public Health and*  
461 *Surveillance.* 2022;8(3):e25697.
- 462 30. Sun L, Lu X, Xie Z, Li D. Public reactions to the new York state policy on flavored  
463 electronic cigarettes on Twitter: observational study. *JMIR Public Health and Surveillance.*  
464 2022;8(2):e25216.
- 465 31. Zhou R, Tang Q, Xie Z, Li D. Public Perceptions of the Food and Drug Administration's  
466 Proposed Rules Prohibiting Menthol Cigarettes on Twitter: Observational Study. *JMIR*  
467 *Formative Research.* 2023;7(1):e42706.
- 468 32. Zheng Z, Xie Z, Li D. Discussion of waterpipe tobacco smoking on reddit. *Heliyon.*  
469 2022;8(9):e10635.
- 470 33. Lu X, Sun L, Xie Z, Li D. Perception of the Food and Drug Administration Electronic  
471 Cigarette Flavor Enforcement Policy on Twitter: Observational Study. *JMIR Public Health*  
472 *Surveill.* 2022;8(3):e25697.
- 473 34. Zhang S, Sun L, Zhang D, Li P, Liu Y, Anand A, et al. The COVID-19 Pandemic and  
474 Mental Health Concerns on Twitter in the United States. *Health Data Sci.* 2022;2022:9758408.
- 475 35. Grootendorst MJapa. BERTopic: Neural topic modeling with a class-based TF-IDF  
476 procedure. 2022.
- 477 36. Lewis MJ, Ling PM. "Gone are the days of mass-media marketing plans and short term  
478 customer relationships": tobacco industry direct mail and database marketing strategies. *Tob*  
479 *Control.* 2016;25(4):430-6.
- 480 37. Dai H, Hao J. Direct Marketing Promotion and Electronic Cigarette Use Among US  
481 Adults, National Adult Tobacco Survey, 2013-2014. *Prev Chronic Dis.* 2017;14:E84.
- 482 38. Huang J, Kornfield R, Szczypka G, Emery SL. A cross-sectional examination of  
483 marketing of electronic cigarettes on Twitter. *Tob Control.* 2014;23 Suppl 3(Suppl 3):iii26-30.

- 484 39. Ben Taleb Z, Laestadius LI, Asfar T, Primack BA, Maziak W. #Hookahlife: The Rise of  
485 Waterpipe Promotion on Instagram. *Health Educ Behav*. 2019;46(1):106-13.
- 486 40. Collins L, Glasser AM, Abudayyeh H, Pearson JL, Villanti AC. E-Cigarette Marketing and  
487 Communication: How E-Cigarette Companies Market E-Cigarettes and the Public Engages with  
488 E-cigarette Information. *Nicotine Tob Res*. 2019;21(1):14-24.
- 489 41. Kassem NO, Kassem NO, Liles S, Reilly E, Kas-Petrus F, Posis AIB, et al. Waterpipe  
490 device cleaning practices and disposal of waste associated with waterpipe tobacco smoking in  
491 homes in the USA. *Tob Control*. 2020;29(Suppl 2):s123-s30.
- 492 42. Ahmed B, Jacob P, 3rd, Allen F, Benowitz N. Attitudes and practices of hookah smokers  
493 in the San Francisco Bay Area. *J Psychoactive Drugs*. 2011;43(2):146-52.
- 494 43. Braun RE, Glassman T, Wohlwend J, Whewell A, Reindl DM. Hookah use among  
495 college students from a Midwest University. *J Community Health*. 2012;37(2):294-8.
- 496 44. Maziak W, Taleb ZB, Bahelah R, Islam F, Jaber R, Auf R, et al. The global epidemiology  
497 of waterpipe smoking. *Tob Control*. 2015;24 Suppl 1(Suppl 1):i3-i12.
- 498 45. Smith-Simone S, Maziak W, Ward KD, Eissenberg T. Waterpipe tobacco smoking:  
499 knowledge, attitudes, beliefs, and behavior in two U.S. samples. *Nicotine Tob Res*.  
500 2008;10(2):393-8.

501

## 502 **Supporting Information**

503 **S1 Fig. Temporal trend in promotional waterpipe-related users**

504 **S2 Fig. Proportion of major topics in promotional waterpipe related tweets over time.** Topic

505 1: Promotion from hookah lounges and online hookah business; Topic 2: Promoting hookah parties  
506 and events; Topic 3: Promoting engineered and durable hookah products.

507 **S1 Table. Top Twitter/X accounts with the most promotional waterpipe-related tweets.**

508

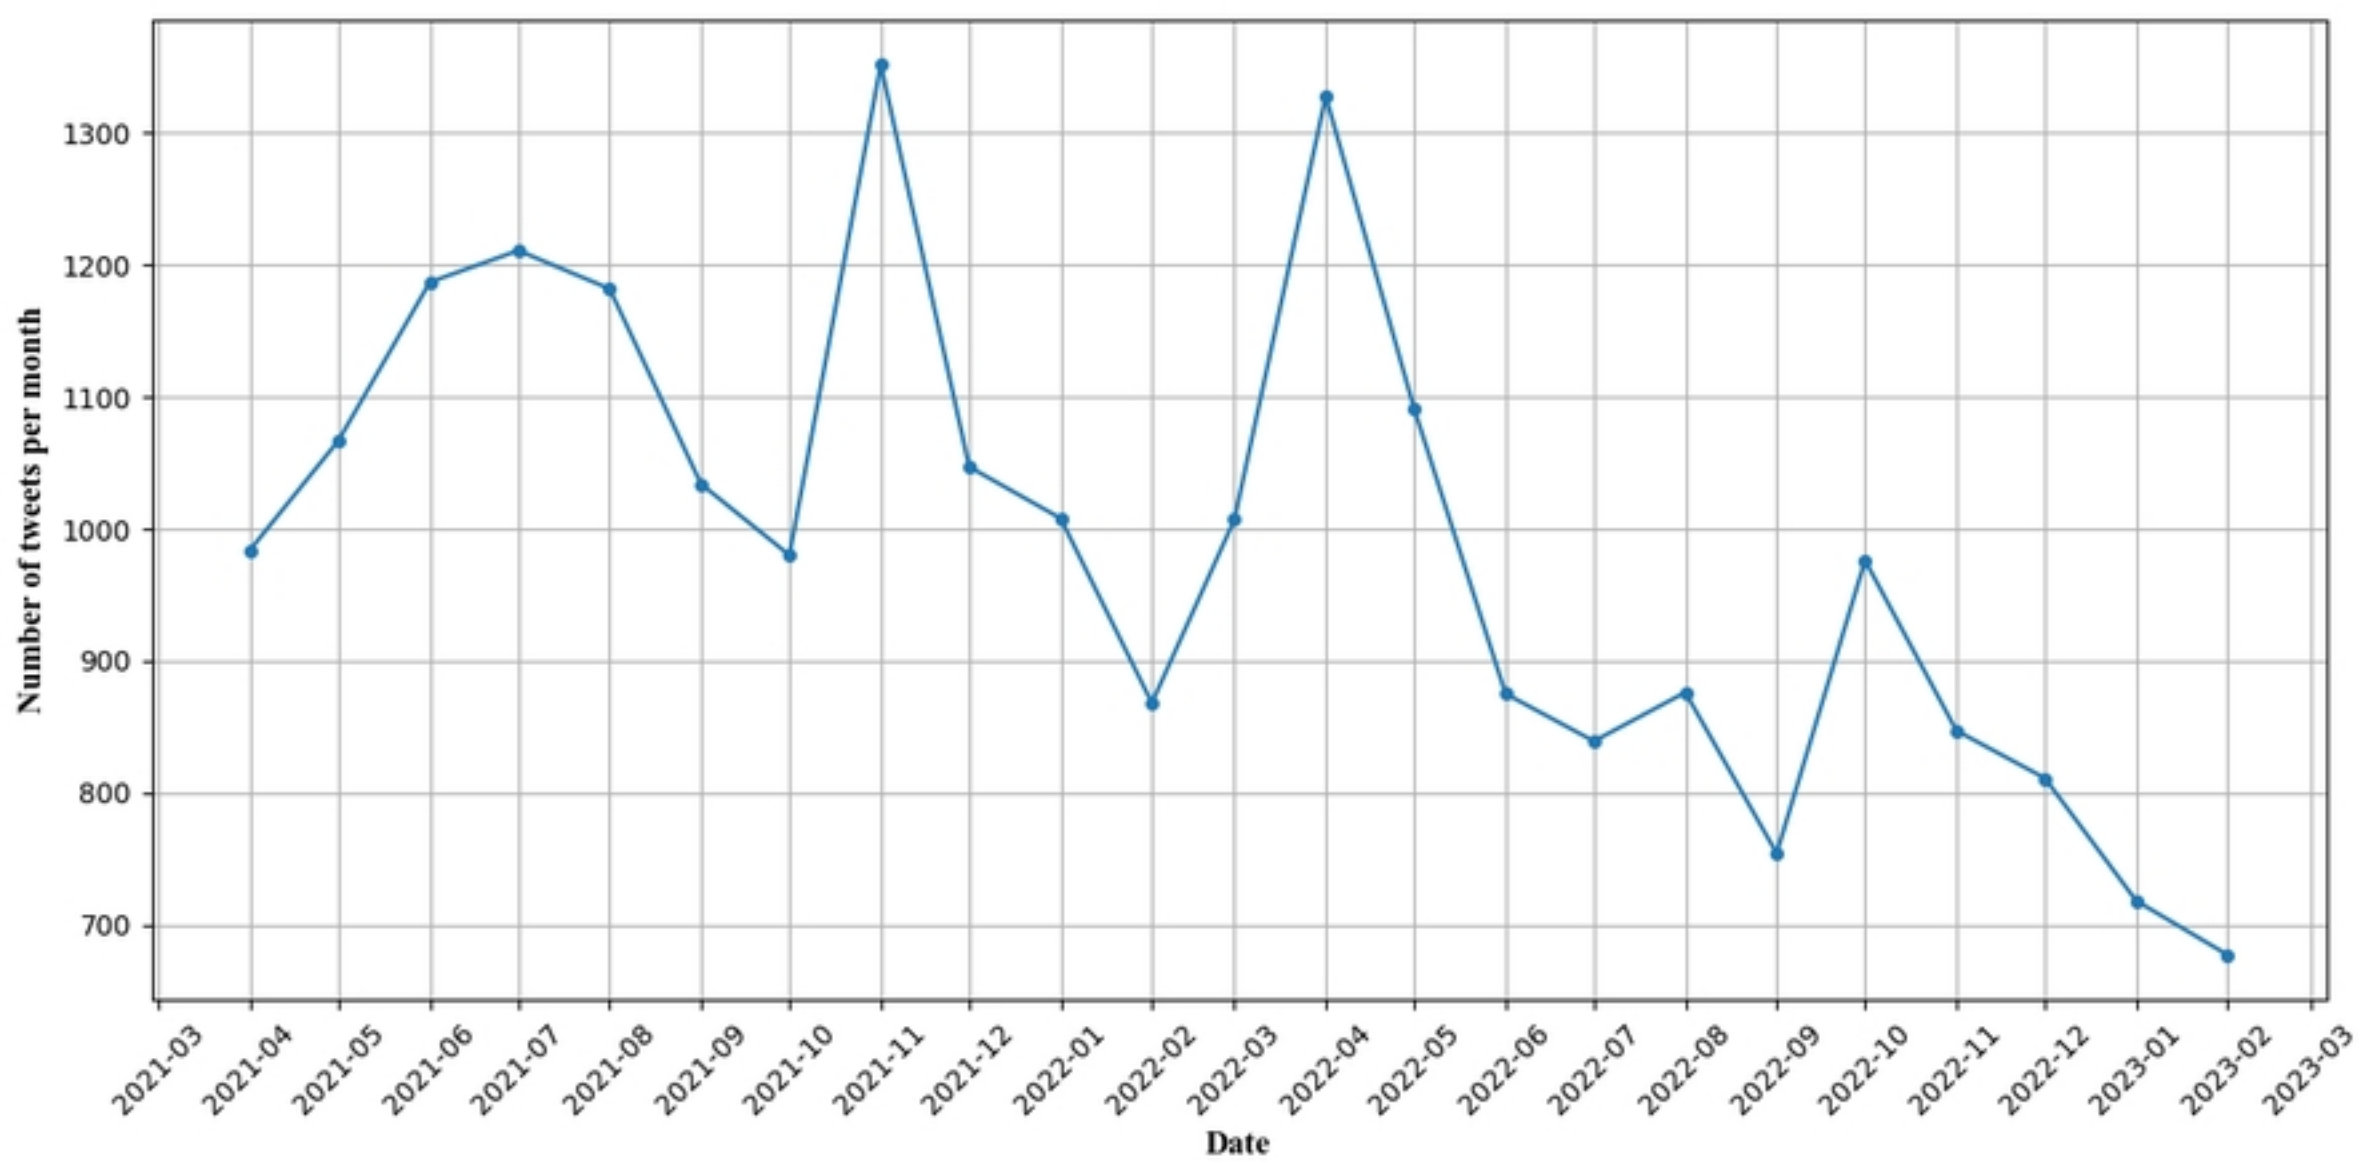

Figure 1



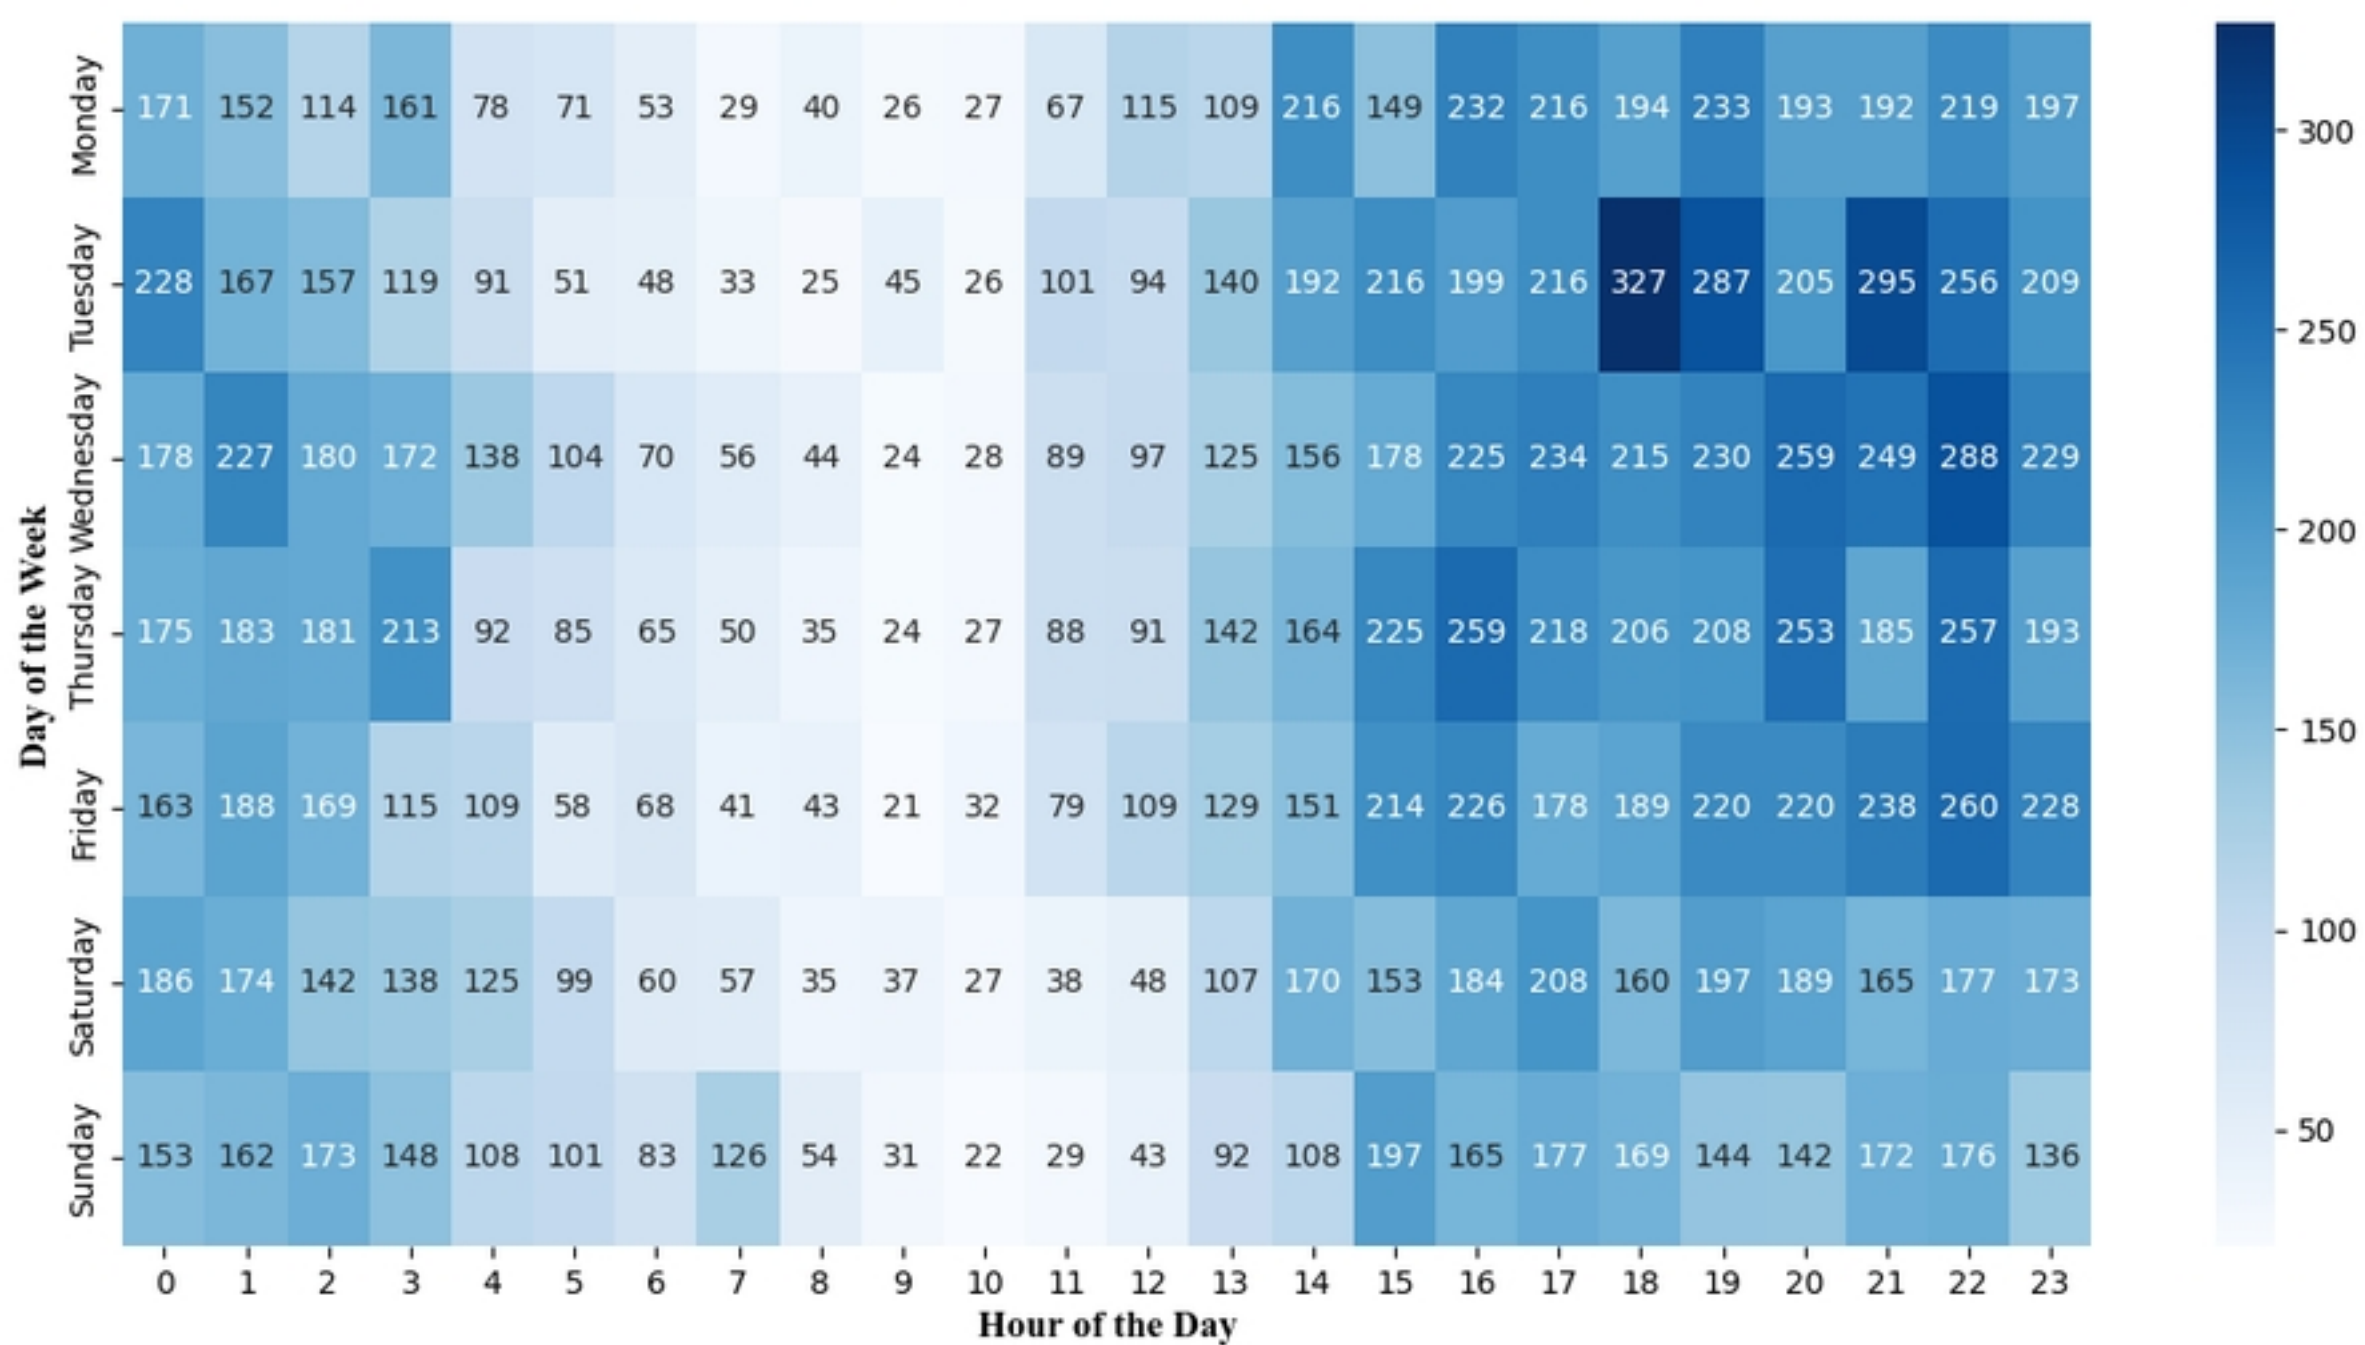

Figure 2

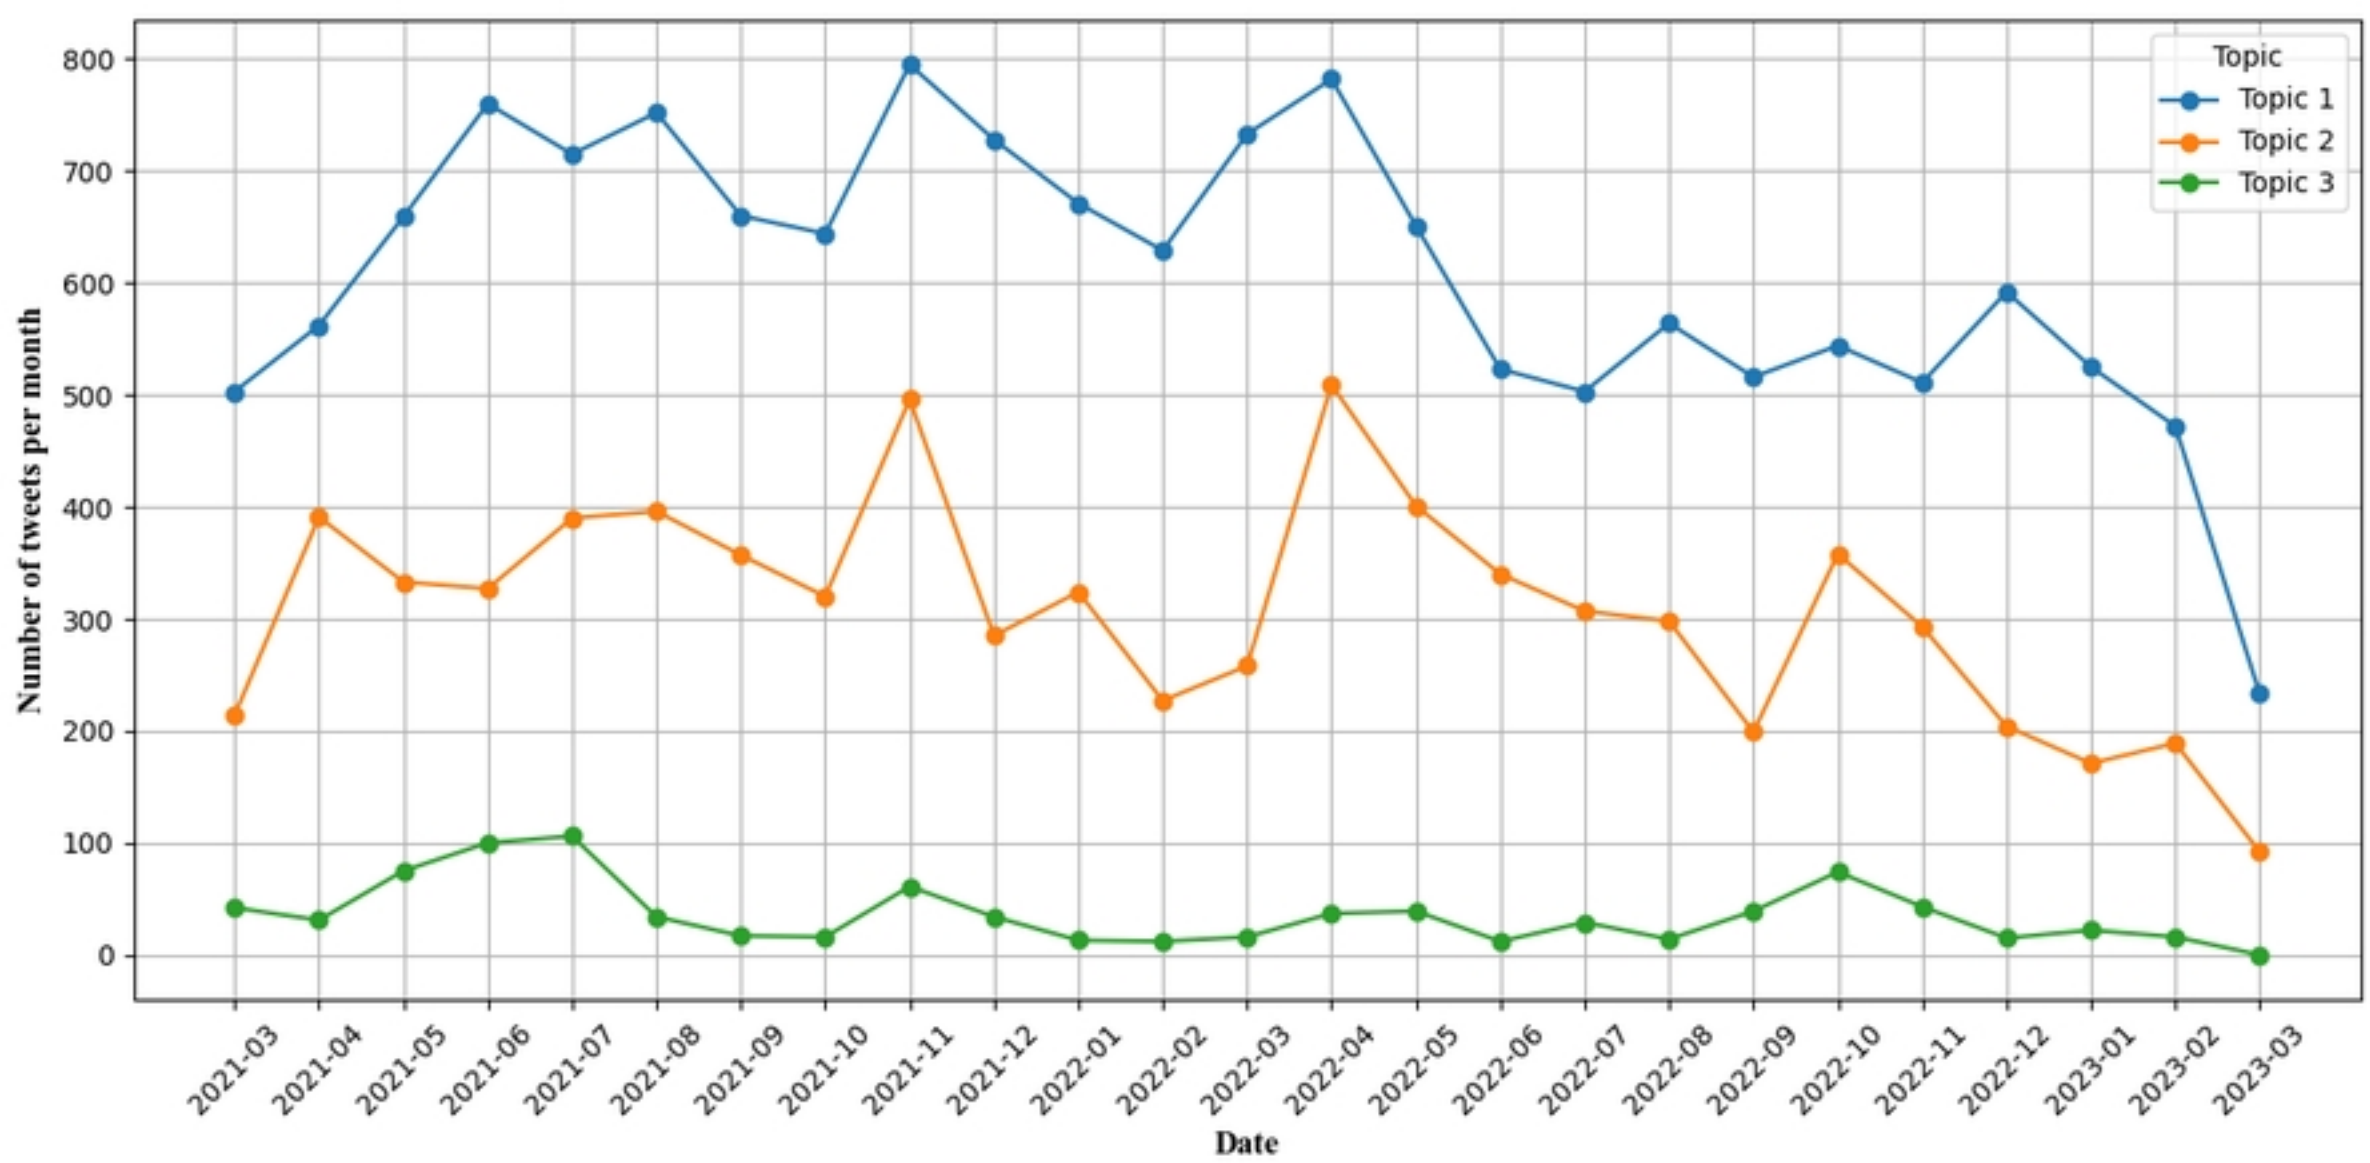

Figure 3
